# Supplementary material for: Evaluation of different strategies for determination of selenomethionine (SeMet) in selenized yeast by asymmetrical flow field flow fractionation coupled to inductively coupled plasma mass spectrometry (AF4-ICP-MS)
Source: Royal Society of Chemistry journal article supplement (doi:10.1039/d0ay00658k), 2020-01-01
Supplement: d0ay00658k1.pdf [file d0ay00658k1.pdf]

## Supplementary Information

### Analytical Methods

**Evaluation of different strategies for Selenomethionine (SeMet) analyses in selenized yeast by asymmetrical flow field flow fractionation coupled to inductively coupled plasma mass spectrometry (AF4-ICP-MS).**

**Daniel B. Alcântara<sup>a,b,c</sup>, Ronaldo F. Nascimento<sup>c</sup>, Gisele S. Lopes<sup>b</sup>, Patricia Grinberg<sup>\*a</sup>**

<sup>a</sup>Chemical Metrology, NRC Metrology, National Research Council of Canada, Ottawa, Canada.

<sup>b</sup>Laboratório de Estudos em Química Aplicada (LEQA), Departamento de Química Analítica e Físico-Química, Universidade Federal do Ceará (UFC), 60455-760 Fortaleza-CE, Brazil.

<sup>c</sup>Laboratório de Análise de Traços (LAT), Departamento de Química Analítica e Físico-Química, Universidade Federal do Ceará (UFC), 60455-760 Fortaleza-CE, Brazil.

**\*corresponding author:** [patricia.grinberg@nrc-cnrc.gc.ca](mailto:patricia.grinberg@nrc-cnrc.gc.ca) (Patricia Grinberg)

**Table S1** SeMet molecular size from different sample preparation in 10 kDa RC membrane estimated by Berry model first-order fit using MALS detector and Astra 5 software.

| <b>Sample preparation</b>                     | <b>RMS/nm <math>\pm</math> RSD</b> |
|-----------------------------------------------|------------------------------------|
| FA, not filtered                              | 163 $\pm$ 5                        |
| FA, filtered                                  | 160 $\pm$ 5                        |
| MSA, no refluxed and no filtered              | 155 $\pm$ 4                        |
| MSA, no refluxed and filtered                 | 209 $\pm$ 16                       |
| MSA, refluxed and no filtered                 | 140 $\pm$ 9                        |
| MSA, refluxed and filtered                    | 138 $\pm$ 16                       |
| SDS buffer, not filtered                      | 482 $\pm$ 11                       |
| SDS buffer, filtered                          | 356 $\pm$ 6                        |
| Water, not filtered                           | 164 $\pm$ 7                        |
| Water, filtered                               | ND                                 |
| Water, with ultrasonic bath and not filtered  | 146 $\pm$ 4                        |
| Water, with ultrasonic bath and filtered      | ND                                 |
| Water, with ultrasonic probe and not filtered | 149 $\pm$ 11                       |
| Water, with ultrasonic probe and filtered     | ND                                 |

ND: not detected by MALS; RMS: root-mean-square radius; FA: formic acid; MSA: methane sulfonic acid; SDS: sodium dodecyl sulfate; RSD: relative standard deviation.

**Table S2** Comparison of different methodologies for SeMet analyses in different yeast samples.

| Sample | Form of Se as presented on label                | Labeled Se <sup>a</sup> (µg Se/tablet) | Average tablet mass (g) | SeMet (µg Se/tablet) ± SD |                          |
|--------|-------------------------------------------------|----------------------------------------|-------------------------|---------------------------|--------------------------|
|        |                                                 |                                        |                         | FFF-ICP-MS                | HPLC-ICP-MS <sup>b</sup> |
|        |                                                 |                                        |                         | 1                         | Selenium (yeast)         |
| 2      | SelenoExcell® selenium (as high selenium yeast) | 200                                    | 0.504                   | 142.5 ± 24                | 131.2 ± 20.2             |

<sup>a</sup> total selenium is the sum of Se methionine and inorganic selenium

<sup>b</sup> data from LeBlanc et al [43] (sample 1 refers to S3, sample 2 refers to S6)

SD: standard deviation

**Fig. S1** Fractionation analysis where were collected three fraction of the cross flow waste (during the injection, focus and elution steps) and one fraction of the detector waste (corresponding to the elution peak)

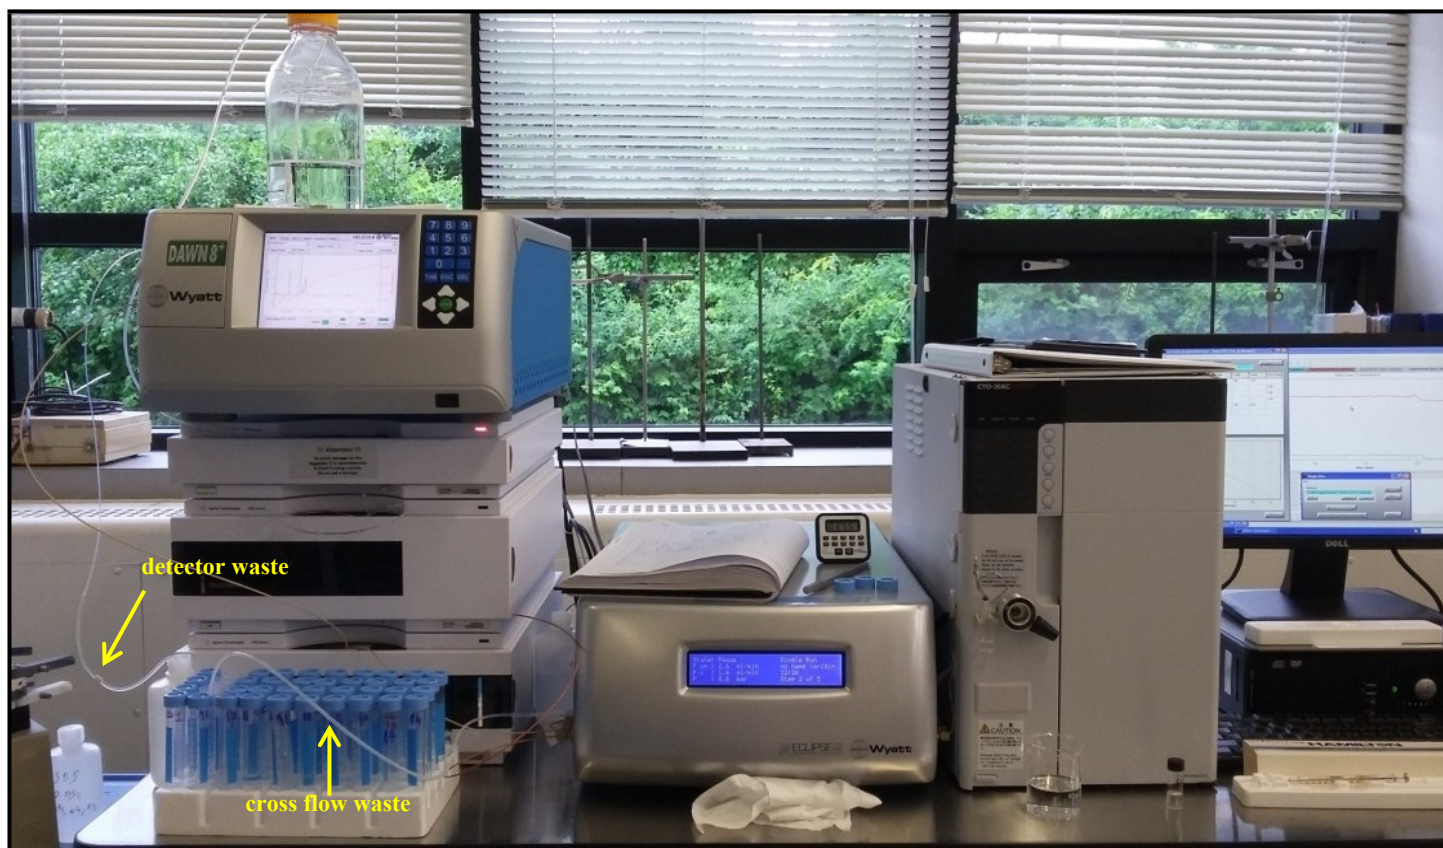

**Fig. S2** SeMet containing molecule fractograms for different sample preparation obtained by MALS detector and 10 kDa RC membrane. Extraction in (a) formic acid; (b) methanesulfonic acid without reflux; (c) methanesulfonic acid with reflux;(d) sodium dodecyl sulfate buffer; (e) Water

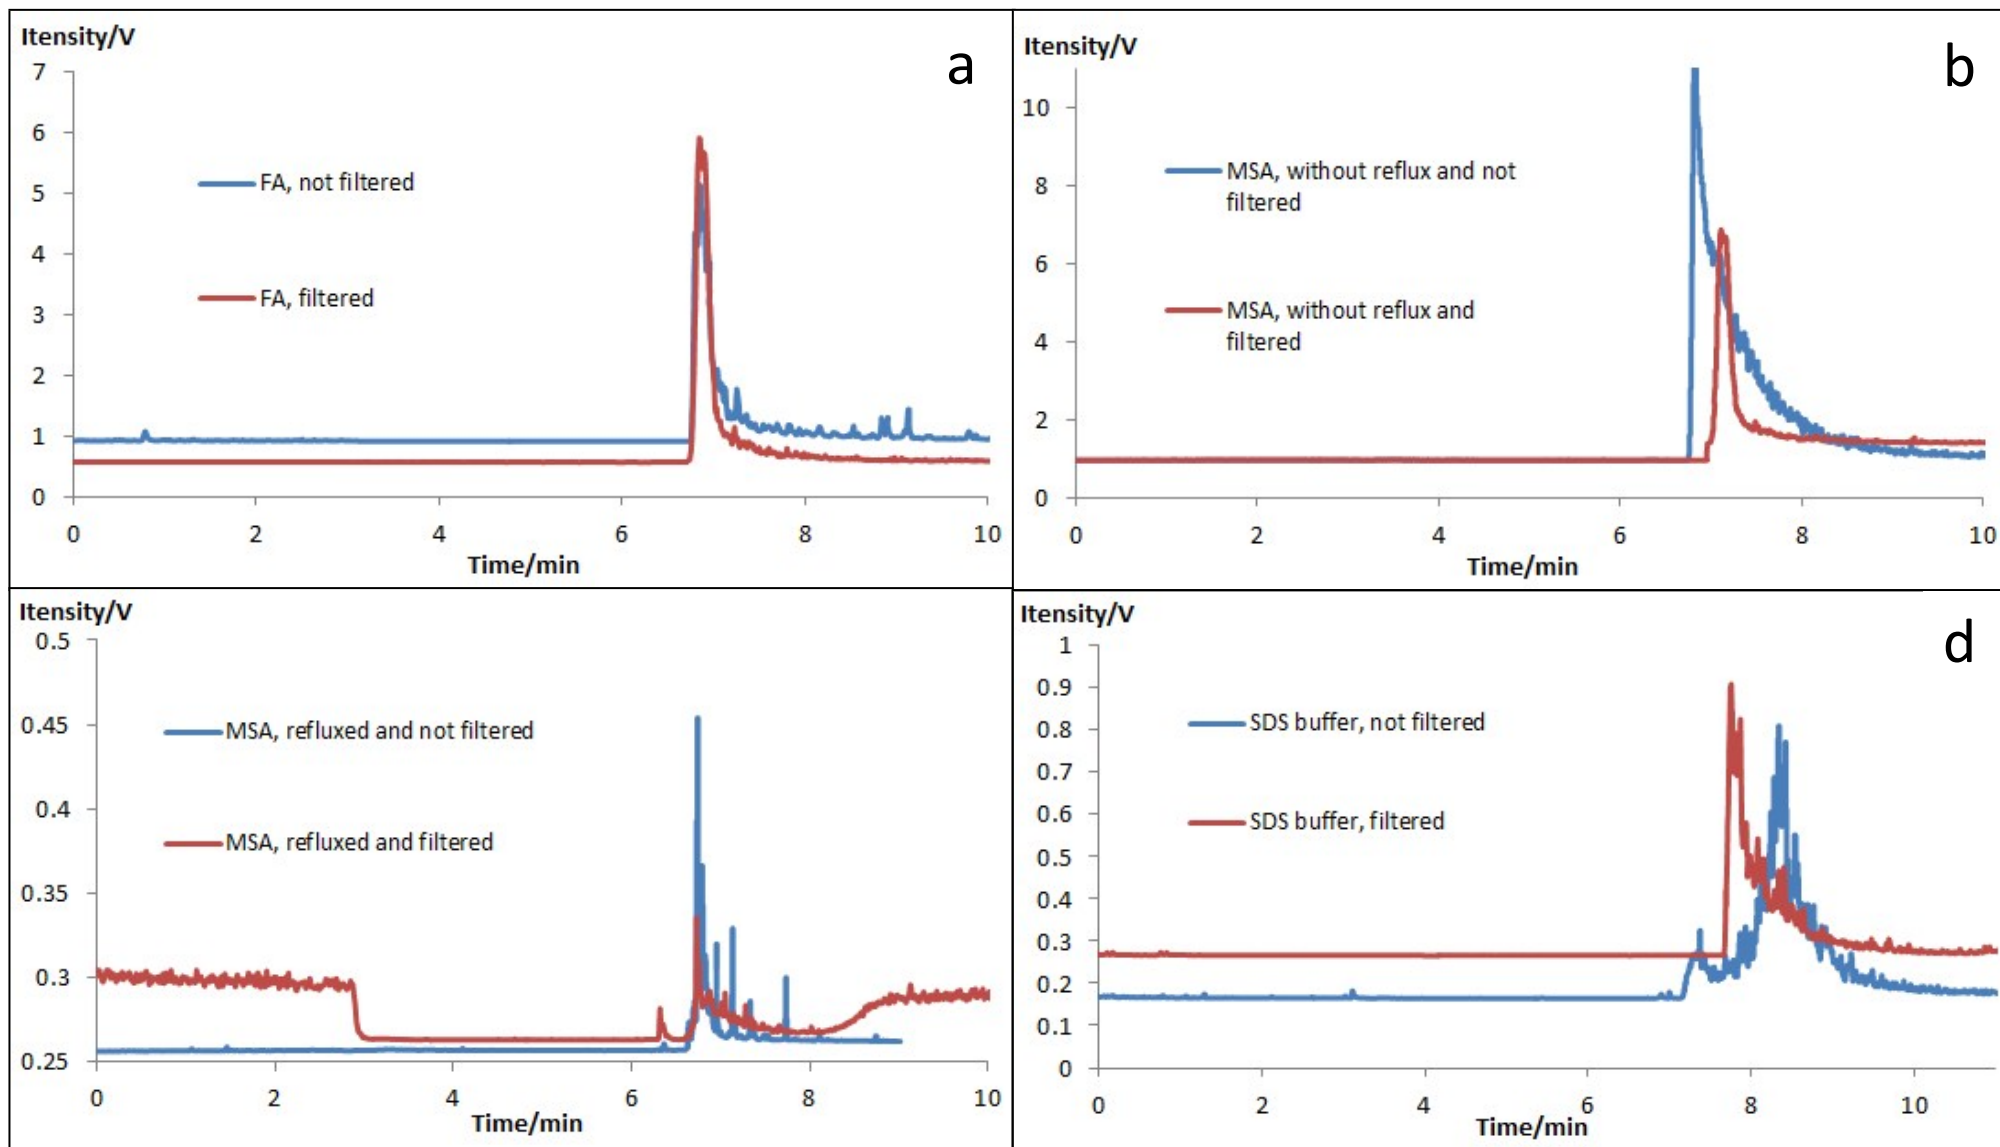

Fig. S2 (continued)

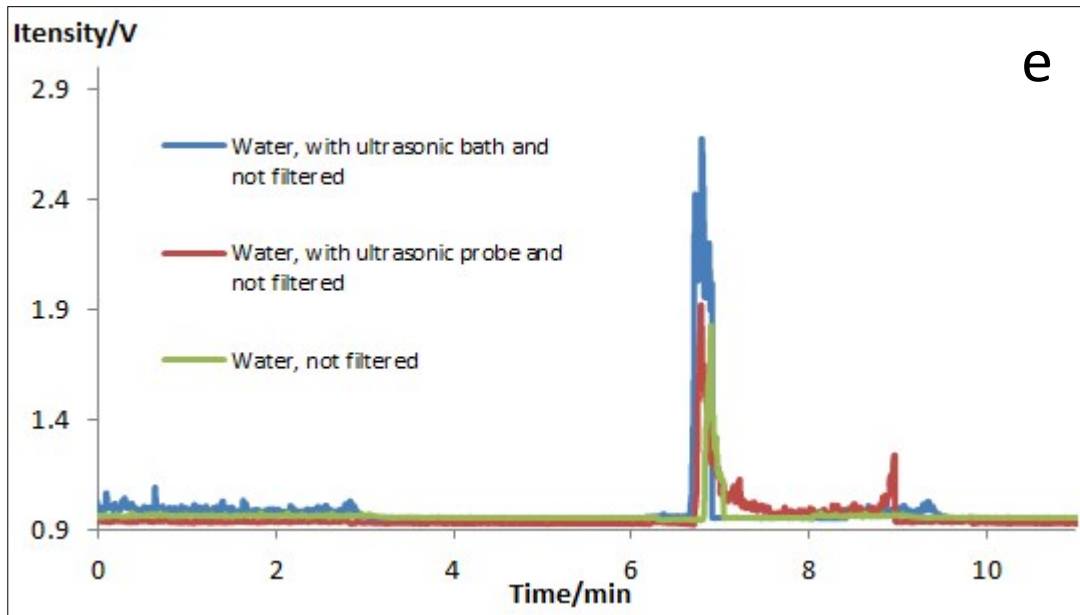

Note: The digestion using SDS buffer was diluted 50 times before injection;

MALS: Multi-Angle Light Scattering; FA: formic acid; MSA: methane sulfonic acid; SDS: sodium dodecyl sulfate;

Retention time/min: FA not filtered: 6.851;

FA filtered: 6.834;

MSA not filtered and not refluxed: 6.810;

MSA filtered and not refluxed: 7.096;

MSA not filtered and refluxed: 6.736;

MSA filtered and refluxed: 6.728;

SDS buffer not filtered: 8.325;

SDS filtered: 7.743;

Water with ultrasonic bath and not filtered: 6.785;

Water with ultrasonic probe and not filtered: 6.777;

Water: 6.892.

**Fig. S3** Comparison of angular coefficients of two Se species. Curves obtained by FIAS system

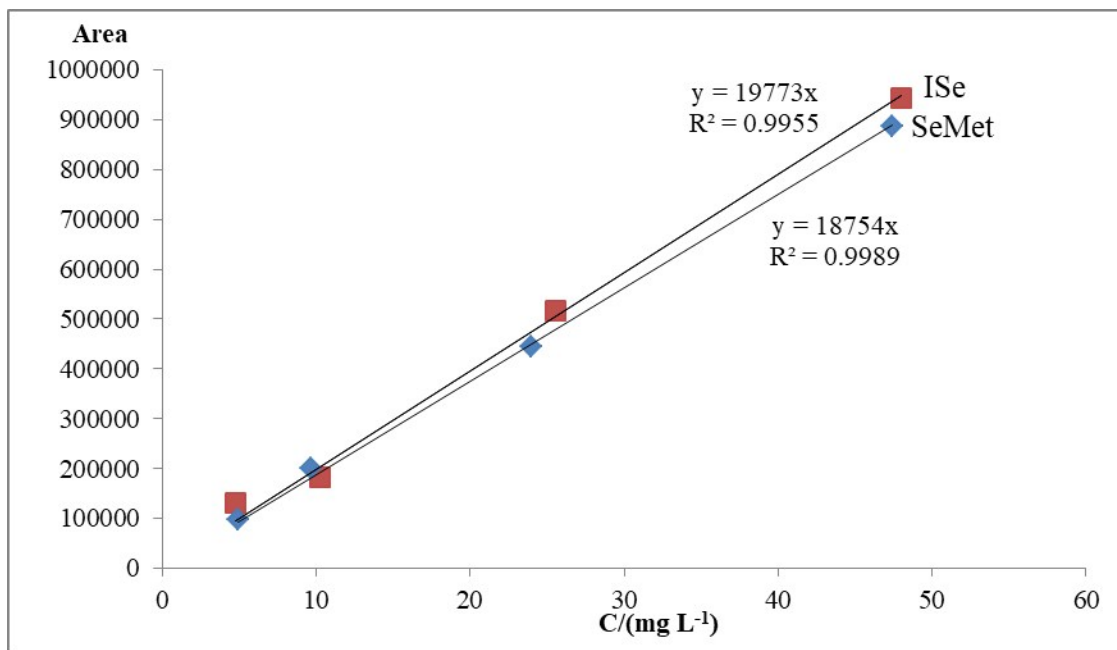

Note: Se: selenium; ISe: inorganic selenium; SeMet: selenomethionine; FIAS: flow injection analysis system.

➤ Statistical ‘Hartley F test’ (for 2 freedom degrees and 95% confidence):

$$F_{calc} = \frac{S_{higher\ ang.\ coef.}^2}{S_{lower\ ang.\ coef.}^2} = \frac{19773^2}{18754^2} = 1.11; \quad F_{critical} = 19$$

As  $F_{calc} < F_{critical}$  there is no significant difference, which means, whatever the curve used to quantify SeMet, the results will be similar within the statistical error.
